# Supplementary material for: Clinical risk assessment of biotin interference with a high-sensitivity cardiac troponin T assay
Source: publisher site journal article supplement (doi:10.1515/cclm-2019-0962), 2020-08-17
Supplement: Supplementary file 1 [file j_cclm-2019-0962_suppl.docx]

ONLINE DATA SUPPLEMENT

Clinical risk assessment of biotin interference with a high-sensitivity cardiac troponin T assay

**Corresponding author**: Dusanka Kasapic, Roche Diagnostics International Ltd, Forrenstrasse 2, 6343 Rotkreuz, Switzerland. Tel: +41 41 798 7242; Fax: +41 41 798 5674; e-mail: dusanka.kasapic@roche.com.

# SUPPLEMENTAL METHODS

# Quantification of biotin concentrations in the study cohorts

**Supplemental Figure 1.** Method comparison of the Elecsys biotin assay and liquid chromatography-tandem mass spectrometry method. The Elecsys biotin assay shows high correlation (Pearson’s *R*2 = 0.9488) with the liquid chromatography-tandem mass spectrometry method for measuring biotin concentrations.


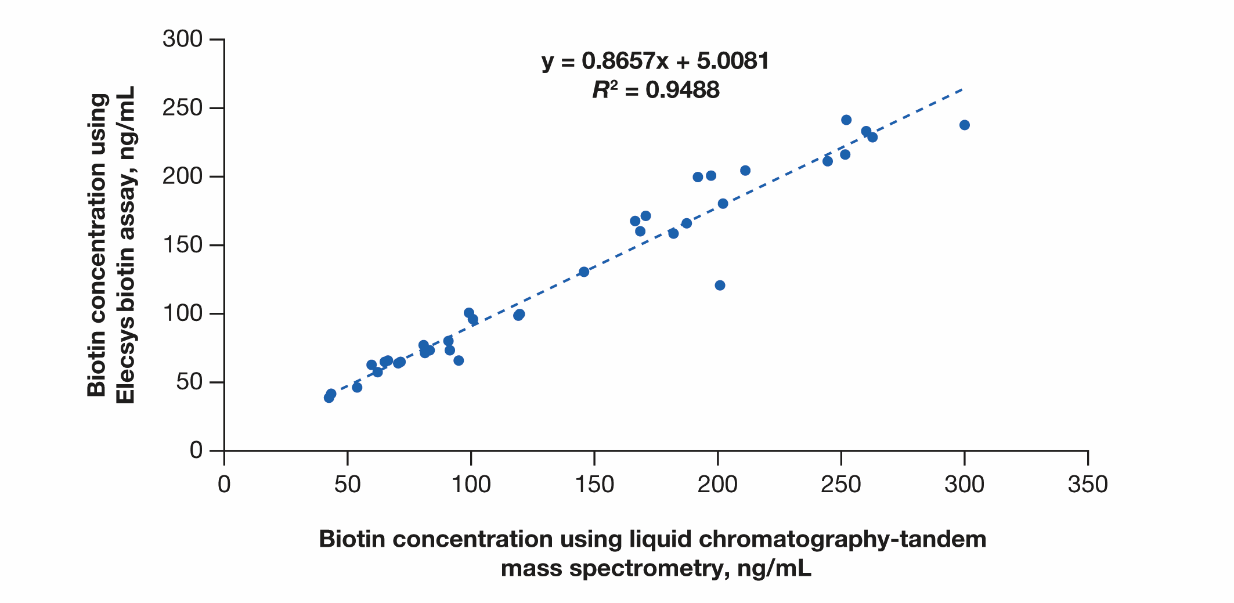


# Model 2: Risk calculation based on extrapolated biotin prevalence data in random samples from a United States (US) laboratory network (US laboratory cohort)

The US laboratory cohort was intended to reflect the general US population, while extrapolating to higher biotin concentrations that may be observed in patients with multiple sclerosis taking high-dose biotin treatments/supplements (Supplemental Figures 2 and 3). The extrapolation considered data from: a population pharmacokinetic biotin study [1]; pharmacokinetic studies of high-dose biotin therapy in healthy volunteers and patients with multiple sclerosis [2, 3]; and a 2017 biotin prevalence study of US emergency department patients, in which biotin was measured using liquid chromatography-tandem mass spectrometry in residual plasma samples [4]. Further details on the pharmacokinetic studies are provided below.

To calculate the likelihood of biotin interference per International Organization for Standardization 14971 guidelines [5], a Kernel density estimation was applied to the available data to obtain a denser distribution of biotin concentrations and generate 10 million data points [6]. Biotin concentrations according to the prevalence data were simulated via random sampling with replacement from the 10 million prevalence data points. A US-specific distribution of cardiac troponin T (cTnT) concentrations were extracted from a global Roche Diagnostics data collection system of participating customers. The extracted cTnT data were aggregated non-personal data, which were collected according to data privacy regulations; there were approximately 1 million analyte data points. These data were collected from patients for whom the TnT Gen 5 test was ordered, thus reflecting the distribution of cTnT concentrations in the intended-use population. The relative concentration change caused by the simulated biotin concentration was read from the assay-specific biotin interference curve.

The risk of a patient having a combination of biotin and cTnT concentrations that could lead to misclassification was calculated based on the number of samples that passed the allowable deviation for the TnT Gen 5 assay; this was applied to all samples tested, irrespective of cTnT concentration. The allowable deviation was defined conservatively, although the Third Universal Definition of Myocardial Infarction states that acute myocardial infarction diagnosis should not be based on biomarker results alone [7]. The simulation was applied for 10 million values and repeated 200 times to increase statistical robustness.

## Population pharmacokinetic biotin study

Grimsey et al reported that serum biotin concentrations were dose proportional: at steady state, median (minimum–maximum) peak biotin concentrations 1 h after a single 5, 10, and 20 mg biotin dose were 41 (10–73), 91 (53–141), and 184 (80–355) ng/mL, respectively [1]. Individuals taking a daily biotin dose of 5 mg had a biotin concentration <30 ng/mL 3.5 h after the last intake. Individuals taking a daily dose of 10 mg had a biotin concentration <30 ng/mL 8 h after the last intake. Measured biotin concentrations did not exceed 355 ng/mL following a dose of 20 mg at steady state.

## Pharmacokinetic studies of high-dose biotin therapy in healthy volunteers and patients with multiple sclerosis

Peyro Saint Paul et al reported that median maximum plasma biotin concentrations in healthy volunteers following single 100 and 300 mg biotin doses were 494.9 (±161) and 823.8 (±301) ng/mL, respectively; median times to maximum concentrations were 1.25 and 1.5 h, respectively (Supplemental Figure 4) [2]. Piketty et al confirmed the findings of Peyro Saint Paul et al; maximum biotin concentrations following a 300 mg dose were <1200 ng/mL (Supplemental Figure 4) [3].

**Supplemental Figure 2.** Overview of risk assessment methodology using extrapolated biotin prevalence data. Random samples were drawn from the biotin prevalence and analyte-specific intended-use population. The risk of a patient having a combination of biotin and cTnT concentrations leading to clinical misclassification was calculated.


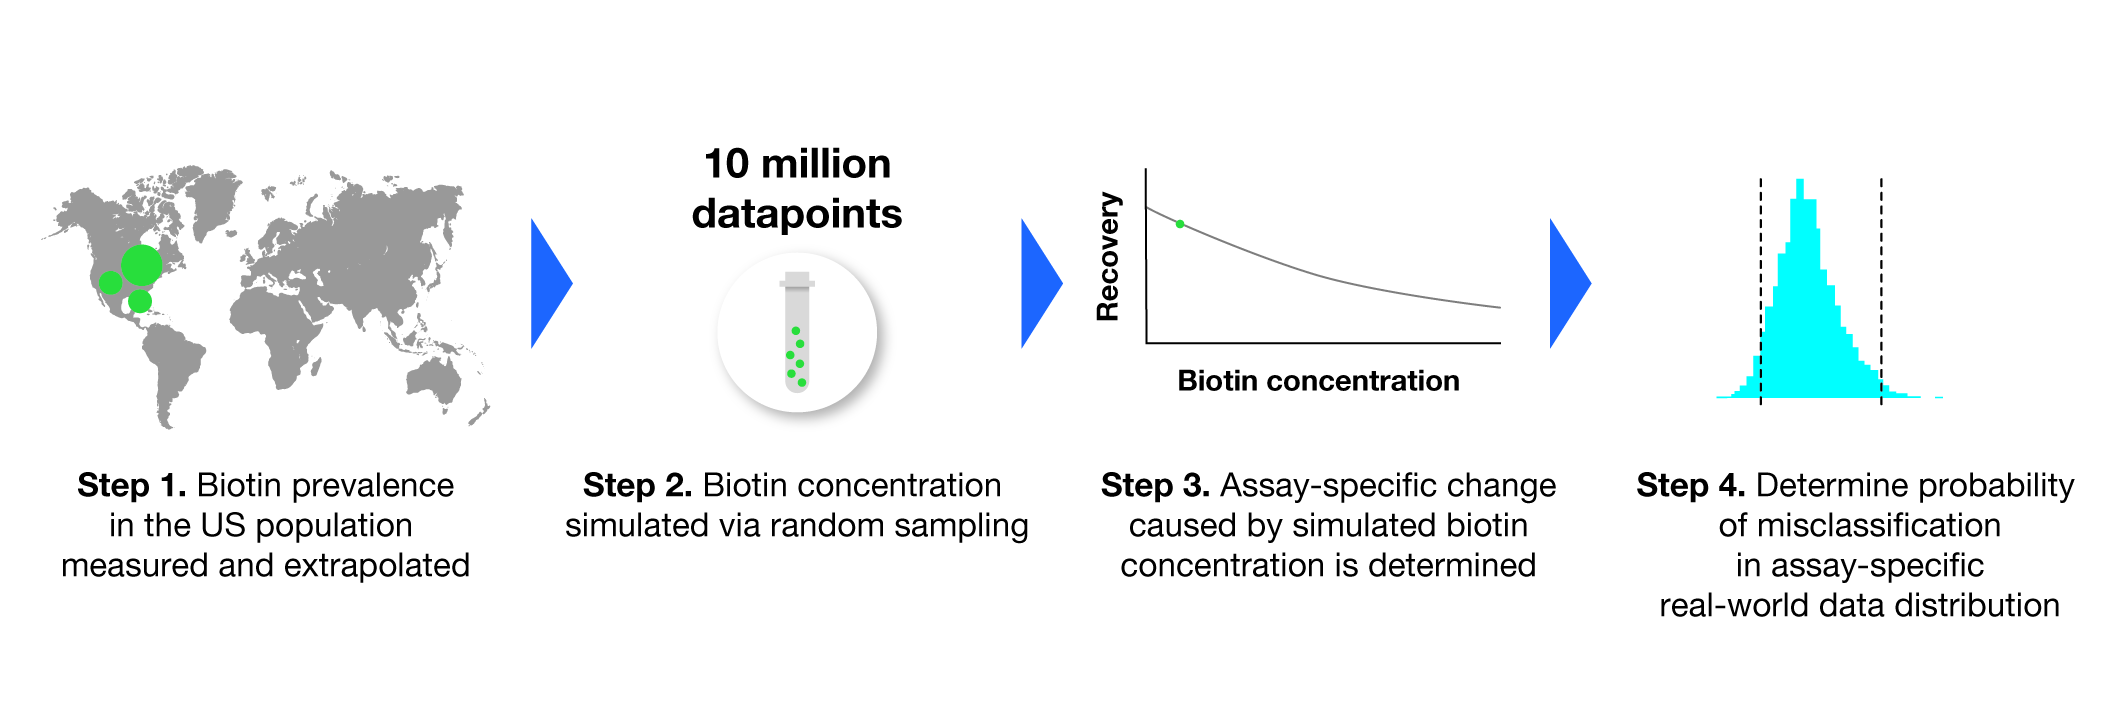


**Supplemental Figure 3.** Estimating the misclassification risk for the Elecsys TnT Gen 5 assay due to biotin interference using extrapolated biotin prevalence data. The risk of a patient having a combination of biotin and cTnT concentrations leading to clinical misclassification was calculated.


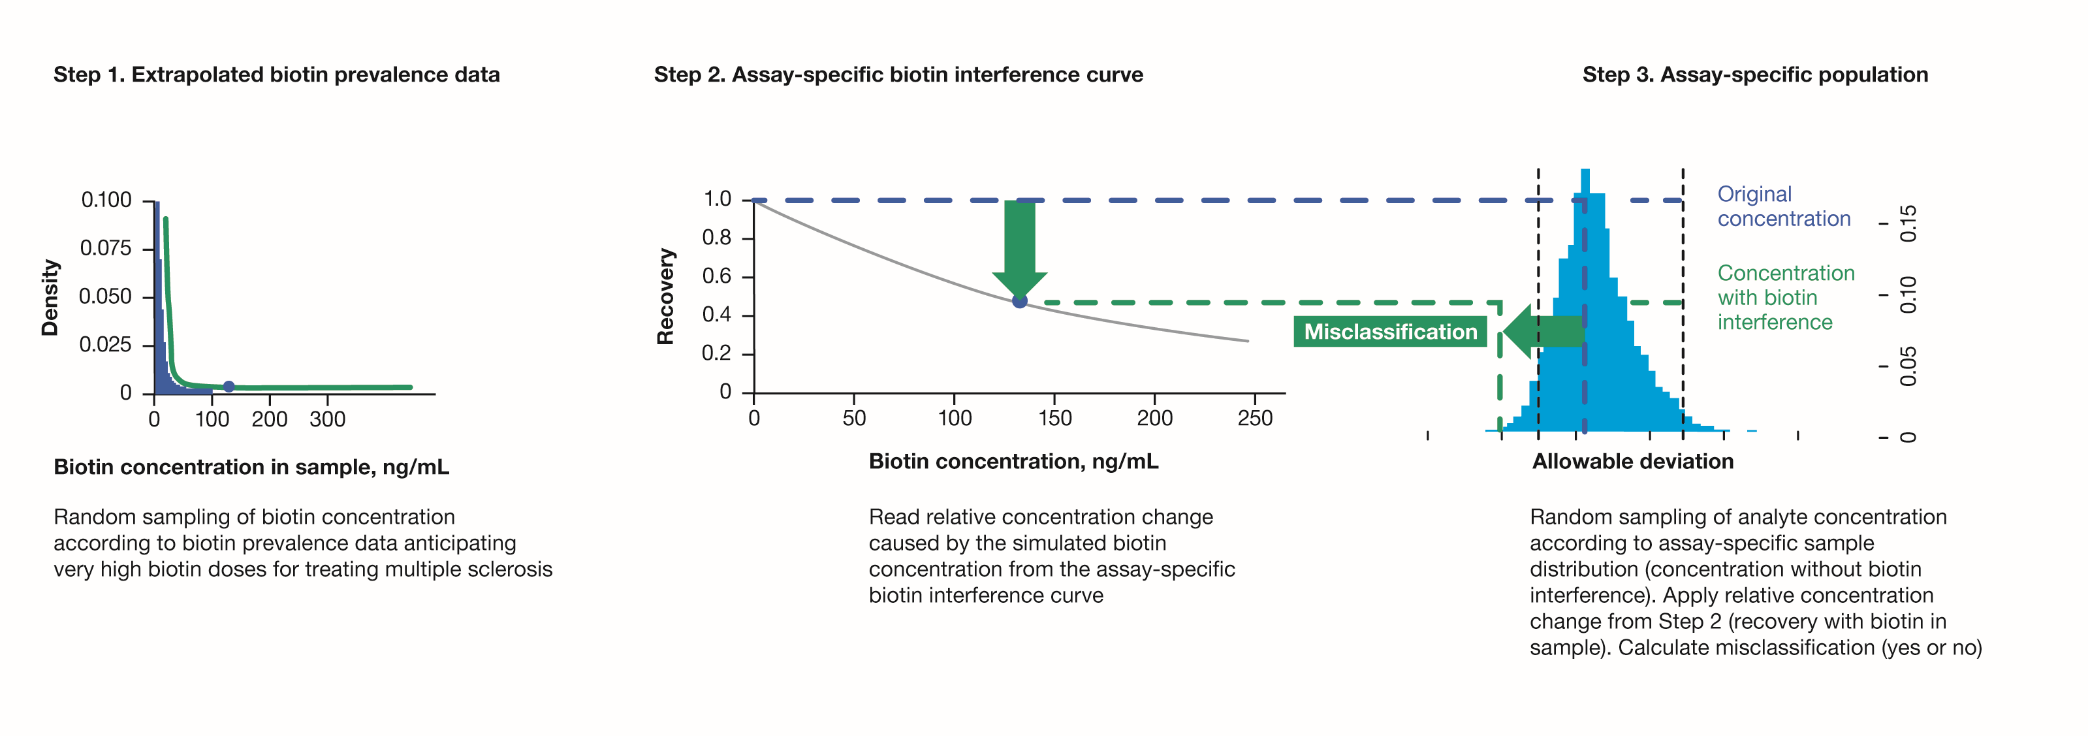


**Supplemental Figure 4.** Biotin concentrations reported in pharmacokinetic studies of high-dose biotin for multiple sclerosis.


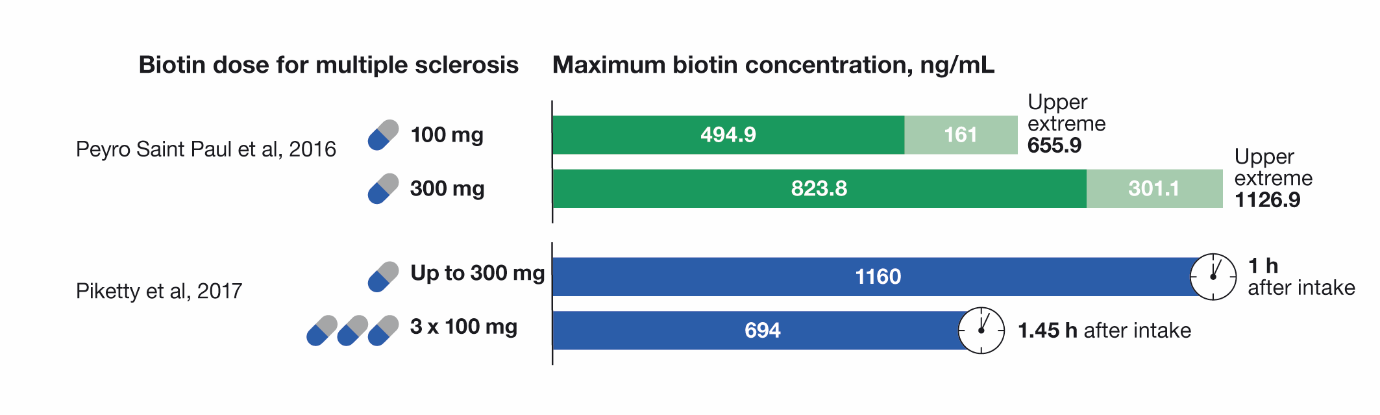


# SUPPLEMENTAL RESULTS

# Prevalence of elevated biotin in the acute coronary syndrome (ACS) cohort

**Supplemental Figure 5**. Distribution of biotin concentrations in 0-h and 3-h blood samples from patients presenting to US emergency departments with suspected ACS. *There was a statistically significant biotin reduction from 0-h to 3-h samples (*P* < 0.001; paired Wilcoxon rank-sum test). Open and closed circles represent measured data and projections, respectively.


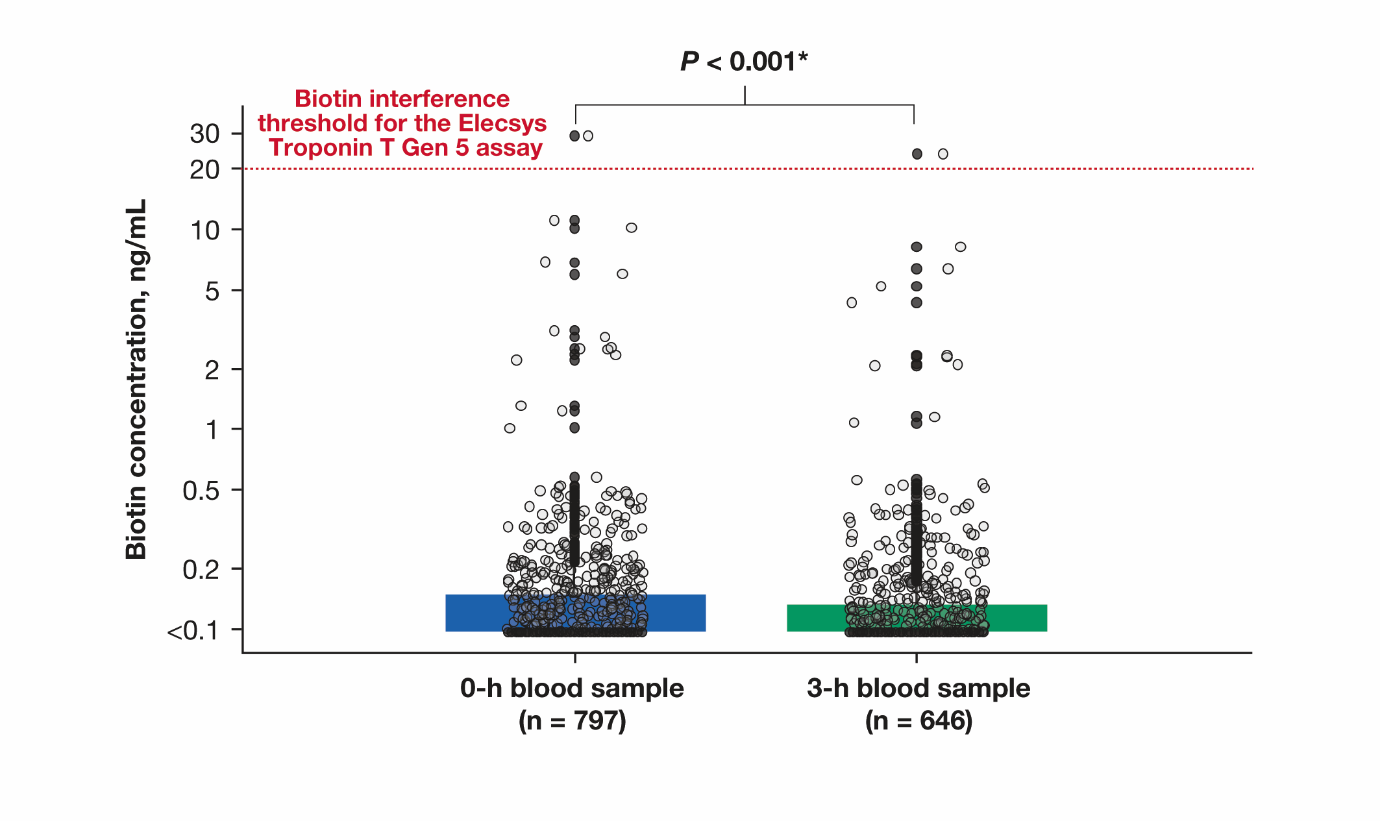


# References

1. Grimsey P, Frey N, Bendig G, Zitzler J, Lorenz O, Kasapic D, et al. Population pharmacokinetics of exogenous biotin and the relationship between biotin serum levels and *in vitro* immunoassay interference. Int J Pharmacokinet 2017;2:247–56.
2. Peyro Saint Paul L, Debruyne D, Bernard D, Mock DM, Defer GL. Pharmacokinetics and pharmacodynamics of MD1003 (high-dose biotin) in the treatment of progressive multiple sclerosis. Expert Opin Drug Metab Toxicol 2016;12:327–44.
3. Piketty ML, Prie D, Sedel F, Bernard D, Hercend C, Chanson P, et al. High-dose biotin therapy leading to false biochemical endocrine profiles: validation of a simple method to overcome biotin interference. Clin Chem Lab Med 2017;55:817–25.
4. Katzman BM, Lueke AJ, Donato LJ, Jaffe AS, Baumann NA. Prevalence of biotin supplement usage in outpatients and plasma biotin concentrations in patients presenting to the emergency department. Clin Biochem 2018;60:11–16.
5. International Organization for Standardization. ISO 14971:2007. Medical devices – application of risk management to medical devices. March 2007. Available at: //www.iso.org/standard/38193.html. Accessed: 18 Jan 2019.
6. Silverman BW. Density estimation for statistics and data analysis. London: Chapman & Hall/CRC, 1986.
7. Thygesen K, Alpert JS, Jaffe AS, Simoons ML, Chaitman BR, White HD, et al. Third universal definition of myocardial infarction. Eur Heart J 2012;33:2551–67.

ELECSYS is a trademark of Roche.
